1           **Application of Different Types of Lactic Acid Bacteria Inoculant on Ensiled Rice Straw;**  
2           **Effects on Silage Quality, Rumen Fermentation, Methane Production and Microbial**  
3           **Population**

4 Ehsan Oskoueian<sup>1</sup>, Saeid Jafari<sup>2</sup>, Reza Noura<sup>3</sup>, Mohammad Faseleh Jahromi<sup>4</sup>, Goh Yong Meng<sup>5</sup>,  
5 Mahdi Ebrahimi<sup>5\*</sup>

6  
7  
8 <sup>1</sup>Mashhad Branch, Agricultural Biotechnology Research Institute of Iran (ABRII), Agricultural  
9 Research, Education, and Extension Organization (AREEO), Mashhad, Iran

10  
11 <sup>2</sup>Department of Veterinary Public Health, Faculty of Veterinary Science, Chulalongkorn University,  
12 Bangkok (10330), Thailand

13  
14 <sup>3</sup> Department of Agriculture, Payame Noor University (PNU), Tehran, Iran

15 <sup>4</sup> Researches and Development Department, Ariana Biotech. Co., Mashhad, Iran

16  
17 <sup>5</sup> Department of Veterinary Preclinical Sciences, Faculty of Veterinary Medicine, University Putra  
18 Malaysia, Serdang, Selangor, Malaysia

19  
20  
21 \* Correspondence should be addressed to Mahdi Ebrahimi: [mehdiebrahimii@gmail.com](mailto:mehdiebrahimii@gmail.com)

34 **Abstract**

35 Bacterial inoculants are known to improve quality of silage. The objectives of the present study were  
36 to evaluate the effects of different types of lactic acid bacteria (LAB; *L. plantarum*, *L. salivarius*, *L.*  
37 *reuteri*, *L. brevis* and *S. bovis*) inoculation ( $10^6$  g<sup>-1</sup> DM) on rice straw silage quality and to examine  
38 these effects on ruminal fermentation characteristics, digestibility and microbial populations in an *in*  
39 *vitro* condition. Inoculated rice straw was ensiled for 15 and 30 days. For *in vitro* study, rumen liquor  
40 was obtained from two rumen fistulated mature cows fed on mixed forage and concentrate at 60:40  
41 ratio twice daily. Inoculation of LAB improved ( $P<0.05$ ) the rice straw silage quality such as  
42 increased dry matter and crude protein contents, decreased pH and butyric acid, and increased  
43 propionic acid and LAB contents especially after 30 days of ensiling. Results from *in vitro* study  
44 revealed that addition of LAB to the rice straw silage improved fermentation characteristics such as  
45 increased total volatile fatty acids and dry matter digestibility ( $P<0.05$ ). LAB treatments also  
46 decreased methane production and methane/total gas ratio after 15 and 30 days of ensiling. From the  
47 rumen microbial population perspective, cellulolytic, and fungal zoospores were enhanced while  
48 protozoa and methanogens were decreased by the LAB treatments. Based on these results, it could be  
49 concluded that inoculating rice straw silage with LAB (especially for *L. plantarum* and *S. bovis*)  
50 improved silage quality, rumen fermentation parameters and microbial populations *in vitro*.  
51 However, *in vivo* studies need to confirm those effects.

52 **Keywords:** *in vitro*, lactic acid bacteria, methane, microbial population, rice straw silage, rumen.

53

54

55

56

57

58

## 59 **Introduction**

60 Use of agricultural by-products is increasing because of limitations in food sources for livestock  
61 which result in economic and environmental concerns. Rice straw, a major agricultural by-product, is  
62 routinely utilized as a food source for ruminants in many regions of East and South-East Asia (Zhang  
63 et al., 2017). In Malaysia, rice straw is one of the most abundant agricultural by-products (Ghazali et  
64 al., 2013). However, rice straw has very low nutritive values with low crude protein content and  
65 metabolic energy for ruminants. Technologies to create high-quality animal feed from agricultural  
66 residues need to be developed. Ensiling is a practical way to utilize water-soluble carbohydrates by  
67 lactic acid bacteria (LAB) under anaerobic conditions to produce organic acids such as lactic acid to  
68 reduce pH and to inhibit the growth of harmful bacteria resulting in good quality silage (He et al.,  
69 2018). Silage feeding is also a way of enhancing livestock production in the tropics especially during  
70 periods of inadequate supply of fresh forage. According to the literature, LAB (homofermentative  
71 and heterofermentative) which are widely used as inoculants, increased the concentration of lactic  
72 acid while lowered the pH and the concentration of  $\text{NH}_3\text{-N}$  in silage (Silva et al., 2016). Several  
73 studies have shown the effectiveness of LAB on the feed quality of rice straw (Zhang et al., 2010;  
74 Cao et al., 2013; LIU et al., 2015; Oladosu et al., 2016). Besides, those studies mentioned that adding  
75 LAB increased the lactic acid content of silage, increased dry matter digestibility, improved *in vitro*  
76 ruminal fermentation parameters and decreased ruminal methane production. However, not all *in*  
77 *vitro* studies have reported reductions in methane production (Contreras-Govea et al., 2011).  
78 It has been hypothesized that LAB silage inoculants could reduce methane emissions from ruminants  
79 by several modes of action; changes in the chemical composition of the silage, interaction of LAB  
80 with rumen microbes and alteration of rumen fermentation (Ellis et al., 2016). Methane, as produced  
81 from anaerobic fermentation in the rumen, accounts for 2-12% loss of dietary gross energy in  
82 ruminants and is a potent greenhouse gas with a global warming potential 23 times higher than that  
83 of carbon dioxide in trapping the heat (Jafari et al., 2018). Therefore, reducing ruminal methane

84 production not only improves the efficiency of nutrient utilization in ruminants but also helps to  
85 protect the environment from the negative consequences of global warming.

86 From the microbiological perspective, some studies indicated that the inclusion of silage alone  
87 (Nguyen et al., 2017) as well as silage + LAB inoculant (He et al., 2018) could improve microbial  
88 population in the rumen. However, to the best of our knowledge, there is still limited information on  
89 the effect of different types of LAB inoculated rice straw silage on microbial population responses.  
90 Therefore, the purpose of this experiment was to test the rumen microbial populations and  
91 fermentation characteristics as well as testing methane mitigation potential of rice straw silage  
92 inoculated with different types of LAB in an *in vitro* condition.

### 93 **Materials and Methods**

94 The protocol for the experimental procedures were reviewed and approved by the Animal Care and  
95 Use Committee of the University of Putra in Malaysia.

### 96 **Isolation, identification and characterization of LAB**

97 Cecal contents from healthy adult, commercial broiler chickens and rumen samples from fistulated  
98 male cattle (body weight: 209 kg) were used for the isolation of LAB. 1 gram of each samples were  
99 dissolved in 9 ml of peptone water (0.01%) and shaken at 200 rpm for 10 min. Several dilution from  
100 each sample ( $10^{-3}$  to  $10^{-7}$ ) were prepared into dilution tube containing peptone water (0.01%). 100  $\mu$ l  
101 of each dilution were transferred into the plate containing MRS Rogosa agar (Oxoid CM 627,  
102 Hampshire, UK) as selective medium for LAB (Ebrahimi, 2012). Plates were anaerobically incubated  
103 at 37 °C for 48h. Several clones were selected from each plate and subcultured for three times. Total  
104 of 80 isolates were selected and tested for Gram stain, hydrogen peroxidase and lactic acid  
105 production. The LAB strains that actively produced lactic acid were chosen for the molecular  
106 identification.

## 107 **Molecular identification**

108 DNA of selected LAB was extracted using DNA extraction kit (QIAamp Blood and Tissue Kit,  
109 Qiagen, Hilden, Germany). The amplification of 16SrRNA genes were conducted using 27F 5'-  
110 AGAGTTTGATCCTGGCTCAG-3' and 1492R- 5'-GGCTACCTTGTTACGACTT-3' primers. The  
111 PCR amplification was performed with i-StarTaq DNA polymerase kit (iNtRON Biotechnology,  
112 Sunghnam, Kyungki-Do, Korea) using 1 µl of a template (10 ng µl<sup>-1</sup>) in 20 µl of reaction solution.  
113 Amplification was performed using a BIORAD MyCycler™ thermal cycler with the following  
114 program: 1 cycle at 94°C for 4 min, 30 cycles of 94°C for 1 min, 55°C for 30s, 72°C for 2 min and a  
115 final extension at 72°C for 5 min. The PCR products were mixed with loading dye and loaded on to  
116 a 1.0% SeaKem® GTG® agarose (FMC BioProducts, Rockland ME, USA) containing ethidium  
117 bromide, and electrophoresis was carried out at 90 V for 1 h. The PCR products were visualized  
118 under UV illumination and excised from the gel and the PCR product was extracted using  
119 MEGAquick-spin PCR & Agarose Gel Extraction kit (iNtRON Biotechnology). PCR product was  
120 sequenced using forward and reverse primers (1<sup>st</sup> Base Co., Malaysia). The contig was done for the  
121 forward and reverse sequences of each isolates by contig assembly program of Bioedit software and  
122 then sequences were analyzed by the Bellerophon and Mallard program to remove chimeric rDNA  
123 clones. Approximately 1400 bp segment of the 16S rRNA gene of the isolates were blast using  
124 National Center for Biotechnology Information (NCBI) library with the following address:  
125 <http://blast.ncbi.nlm.nih.gov/Blast.cgi>.

## 126 **Rice straw ensiling and inoculating procedures**

127 Fresh rice straws used in this experiment were harvested in the fields of the Malaysian Agricultural  
128 Research and Development Institute (MARDI) located in Serdang, Selangor, Malaysia  
129 (3°00'18.88"N, 101°42'15.05"E). Then, they were chopped to 8 - 10 cm long pieces with a  
130 laboratory chopper. Five isolates of LAB (*L. plantarum*, *L. salivarius*, *L. reuteri*, *L. brevis*, and *S.*

131 *bovis*) were used for inoculation and the inoculation rate was based on the numbers of colony-  
132 forming units per gram in the inoculant powders. The dry matter of chopped rice straw was  
133 determined and the inoculants were applied by suspending the appropriate weight of inoculant  
134 powder in required amount of water to increase the moisture content of rice straw to 70% and  
135 spraying it over 2 kg batches of rice straw and mixed thoroughly. Each treatment contained  $10^6$  cfu/g  
136 DM of LAB inoculants. The treated rice straw was ensiled in 500mL Scott bottle. There were 3  
137 bottles per inoculant treatment of each of the silages. The silages were stored for 15 and 30 days at  
138 room temperature (28 to 32°C). Control silages were also prepared at the same time with sterile  
139 water.

#### 140 **Chemical analyses and fermentation quality for rice straw silage**

141 After 15 and 30 days of ensiling, bottles of the untreated and inoculated silages were opened for  
142 analyzing chemical analyses and fermentation quality. 20 g of representative silage were mixed with  
143 180 g sterile water in a laboratory blender (Waring, New Hartford, Conn, USA) for 2 minutes. The  
144 extract was filtered through four layers of gauze and no. 1 filter paper (Whatman, Inc., Clifton, NJ).  
145 The filtrate extract was used for measuring Dry matter (DM), Crude protein (CP), neutral detergent  
146 fiber (NDF), acid detergent fiber (ADF),  $\text{NH}_3\text{-N}$ , pH, LAB population, lactic acid, and volatile fatty  
147 acids (VFA). The DM and CP (total nitrogen  $\times$  6.25) were contents determined using method  
148 number 934.1 and 990.03 (AOAC, 1990), respectively. NDF and ADF were determined according to  
149 Van Soest and coworkers (Van Soest et al., 1991). The concentration of  $\text{NH}_3\text{-N}$  was determined as  
150 described in our previous work (Jafari et al., 2016). The pH was determined using a pH electrode  
151 (Mettler-Toledo Ltd., England). Lactic acid and volatile fatty acids were determined using gas-liquid  
152 chromatography with Quadrex 007 Series (Quadrex Corporation, New Haven, CT 06525 USA)  
153 bonded phase fused silica capillary column (15m, 0.32mm ID, 0.25  $\mu\text{m}$  film thickness) in an  
154 Agilent 7890A gas-liquid chromatography (Agilent Technologies, Palo Alto, CA, USA) equipped  
155 with a flame ionization detector (FID). The total number of LAB in the silage was determined on

156 MRS Rogosa agar as described above with the plate count method (Ebrahimi, 2012). Colonies were  
157 counted from the plates at appropriate dilutions and the number of colony forming units (CFU) was  
158 expressed as log<sub>10</sub> per gram of rice straw.

### 159 ***In vitro* rumen fermentation and digestibility**

160 Two rumen fistulated mature cows were fed (Table 1) at maintenance level on mixed forage and  
161 concentrate at 60:40 ratio twice daily. Rumen liquor was collected before the morning feed from  
162 both fistulated cows and strained through four layers of muslin gauze into a pre-warmed bottle at  
163 39°C. Treated and untreated rice straw used as substrates. A total of six syringes for each treatment  
164 were used for *in vitro* study. The contents of three syringes were used for *in vitro* dry matter  
165 digestibility (IVDMD), fermentation parameters and the remaining three syringes were used for  
166 rumen microbial population quantification. 500 mg of substrate were weighed into 100 ml calibrated  
167 glass syringes. The incubation medium was prepared as described by our previous work (Jafari et al.,  
168 2017) and 40 ml was dispensed anaerobically into each syringe. Syringes were incubated at 39 °C for  
169 24 h. *In vitro* gas production was measured in triplicate at 2, 4, 8, 12 and 24. In each incubation run,  
170 three blanks were used as blank to correct the values for gas released from the substrates. Cumulative  
171 gas production data were fitted in NEWAY Excel Version 5.0 package (Ørskov and McDonald,  
172 1979). The above procedures were conducted in three individual runs. After 24 h of fermentation,  
173 IVDMD of substrates was determined by the contents of syringes. The fermentation end products  
174 (e.g. pH, NH<sub>3</sub>-N and VFA) and the number of LAB were also determined as described earlier.

### 175 **Quantification of rumen microbial population by real-time PCR**

176 The targeted microbes were cellulolytic bacteria such as *Fibrobacter succinogenes*, *Ruminococcus*  
177 *albus*, *Ruminococcus flavefaciens*, general bacteria, general anaerobic fungi, total protozoa, total  
178 methanogens and total archaea. DNA was extracted from 300 µl of fermented rumen content (fluid  
179 and digesta from three syringes) by QIAGEN DNA Mini Stool Kit (QIAGEN, Valencia, CA)

180 according to manufacturer's recommendations. Then the PCR product was purified using a QIA  
181 quick PCR purification kit (QIAGEN, Inc., Valencia, CA) and cloned to the plasmid. The target  
182 DNA was quantified by using serial 10-fold dilutions from  $10^1$  to  $10^8$  DNA copies of the previously  
183 quantified DNA purified plasmid. Microorganisms and sequences of the primers used in this study  
184 are shown in Table 2.

## 185 **Statistical analyses**

186 Data were analyzed using the general linear (GLM) models procedure of SAS (SAS, 2003) in a  
187 completely randomized design and the means were compared with Duncan's Multiple Range test.  
188 Differences of  $P < 0.05$  were considered to be significant.

## 189 **Results**

### 190 **Chemical analyses and fermentation quality of rice straw silage**

191 The contents of DM, CP, ether extract, NDF, ADF were affected ( $P < 0.05$ ) by the treatments (Table  
192 3). The DM contents were numerically decreased as the duration of ensiling increased. The control  
193 group had higher DM content as compared with the LAB treatments at 15 and 30 d of ensilage. The  
194 CP content was greater in LAB treatments as compared with control (10.9-12.7 vs 9.5, respectively).  
195 The NDF and ADF of the LAB treatments were less than those of the control (Table 3). However,  
196 the gross energy was not affected ( $P > 0.05$ ) by the treatments. Analysis of sugar in fermented rice  
197 straw showed significant decrease ( $P < 0.05$ ) in the concentration of glucose and fructose among LAB  
198 treatments as compared with the control.

199 The value of pH decreased in all treatments except for control as the duration of ensiling increased  
200 (from 15 d to 30 d). The LAB treatment groups showed the lowest pH value as compared with  
201 control throughout the ensiling period with pH values between 4.3- 5.3. Lactic acid content (mM)  
202 increased from days 15 to 30 among all treatments; however, LAB treatments were significantly



203 higher than that of control. Among the LAB treatments, *L. plantarum* and *S. bovis* had the highest  
204 lactic acid content at 30 d of ensilage (36.9 and 35.7, respectively). The acetic acid and propionic  
205 acid contents of all treatments increased with the increase in duration of ensiling. Again, *L.*  
206 *plantarum* and *S. bovis* showed the greatest values for acetic and propionic acids at 30 d of ensilage  
207 (24.1 and 2.9 vs 22.5 and 2.5 mM, respectively). Butyric acid content showed a decreasing trend  
208 among the treatments as the duration of ensiling increased, with the highest value for the control (5.5  
209 and 4.6 mM at 15 and 30 d of ensilage, respectively). As compared with the control, LAB treatments  
210 didn't show significant differences ( $P>0.05$ ) in terms of  $\text{NH}_3\text{-N}$  concentration (average: 0.049%).  
211 The analysis of the LAB content (log cfu/g) showed that the LAB treatments exhibited a significant  
212 ( $P < 0.05$ ) difference and increase as compared with control (Table 4).

### 213 ***In vitro* rumen fermentation characteristics, methane production and DM digestibility**

214 According to the data of *in vitro* (Table 5), LAB treatments had less ( $P<0.05$ ) gas production at 24 h  
215 of fermentation as compared with control. Conversely, coefficient of degradable *B* fraction was  
216 greater in LAB treatments especially for *L. plantarum* and *S. bovis* (at 30 d of ensilage) as compared  
217 with control. However, coefficients of rapidly degradable *a* fraction and *c* (degradation rate of  
218 degradable *b* fraction) were not affected ( $P>0.05$ ) by the treatments. The LAB treatments especially  
219 for *L. plantarum* and *S. bovis* at 30 d of ensiling had greater ( $P<0.05$ ) amounts of IVDMD as  
220 compared with control. Total VFA and acetic acid was also greater ( $P<0.05$ ) among LAB treatments.  
221 The concentration of  $\text{NH}_3\text{-N}$  and pH were almost similar among the treatments with no significant  
222 difference ( $P>0.05$ ). Methane production and methane/total gas significantly ( $p<0.05$ ) decreased  
223 between LAB treatments compared with control groups. *L. plantarum* at 15 and 30 d of ensiling  
224 exhibited respectively 46% and 48% of  $\text{CH}_4$  reduction as compared with control.

225

226

## 227 ***In vitro* rumen microbial populations**

228 LAB treatments had greater ( $P < 0.05$ ) total bacteria and fungi at 24 h of fermentation as compared  
229 with control (Table 6). Conversely, control had greater ( $P < 0.05$ ) total protozoa, methanogens and  
230 archaea at the end of *in vitro* fermentation. *Butyrivibrio fibrisolvens* and *Ruminococcus*  
231 *flavafaciens* was lower for control as compared with LAB treatments at 15 and 30 days of silage.  
232 Especially, *L. plantarum* and *S. bovis* at 30 d of silage had the greatest populations of mentioned  
233 bacteria. *Fibrobacter succinogenes* was also almost similar among LAB treatments but higher  
234 ( $P < 0.05$ ) than control group.

## 235 **Discussion**

### 236 **Chemical composition and fermentation characteristics**

237 Inoculating the different types of LAB for ensiled rice straw increased CP content in the current  
238 study. Our results were consistent with the results of Liu et al. (2015) which evaluated the effects of  
239 fermentation using LAB culture broth on the feed quality of rice straw. However, our results are  
240 contradictory to their results in terms of  $\text{NH}_3\text{-N}$ , NDF and ADF contents. The LAB treatments in the  
241 current study did not affect  $\text{NH}_3\text{-N}$  concentration after 15 and 30 days of ensiling. High  
242 concentration of  $\text{NH}_3\text{-N}$  is the results of excessive breakdown of protein during fermentation which  
243 lowers silage quality (Jafari et al., 2018). Lower NDF and ADF contents among the LAB treatments  
244 compared with the control group in this study could be the result of the lower level of heat damage  
245 on protein which improves energy content (Saha et al., 2010) as shown in Table 3. Chen et al.  
246 (2019) mentioned that lower NDF content in silages could also be due to the loss of hemicellulose  
247 occurred in the ensiling process. This loss could be due to a combination of enzymatic and acid  
248 hydrolysis of the more digestible cell wall fractions during the fermentation. DM is the remaining  
249 materials after the removal of water and contains the main nutrients for animal consumption.  
250 Ensilage of the forage will mostly result in the DM loss which occurs during the fermentation. In the

251 current study, inoculations of different LAB decreased the DM loss which could be due to inhibiting  
252 the *clostridia* and aerobic bacteria (Ni et al., 2015). The lack of DM loss in our study was also  
253 consistent with the application of LAB isolated from forage paddy rice silage in China (Ni et al.,  
254 2015).

255 The previous studies showed that bacterial inoculation of silage could convert the composition of  
256 cell-wall carbohydrates into organic acids and cause a decrease in pH during fermentation (Baek et  
257 al., 2017). In the current study, pH decreased with increase in the duration of ensiling among the  
258 LAB treatments (especially for *L. plantarum* and *S. bovis*) which was consistent with those in the  
259 literature. Silage pH (the lower the better) is one of the main factors depicting the extent of  
260 fermentation and quality of ensiled forage (Chen et al., 2019). The lower pH among LAB treatments  
261 (4.99) VS control (5.6) suggests good fermentation. Consistently, Kim et al. (2017) indicated that *L.*  
262 *plantarum* inoculant for fresh rice straw silage decreased the pH, acetic acid, NH<sub>3</sub>-N, and butyric  
263 acid contents (Kim et al., 2017). However, in our study, LAB treatments improved acetic acid with  
264 no effect on butyric acid content. A high concentration of butyric acid is the sign of protein  
265 degradation and DM loss as well as energy wastage (Oladosu et al., 2016). Kim et al. (2017) also  
266 concluded that adding *L. plantarum* could improve the fermentation quality and feed value of rice  
267 straw silage. Inoculation of the mixture of corn steep liquor and air-dried rice straw with homo  
268 fermentative (*L. plantarum*) and hetero-fermentative (*L. plantarum*, *Lactobacillus casei*, and  
269 *Lactobacillus buchneri*) LAB significantly increased the concentration of acetic acid and lactic acid  
270 compared with the control in a study conducted in China (Li et al., 2016). Our results were also  
271 consistent with that study in terms of increased acetic acid and lactic acid contents. High  
272 concentration of lactic acid results in lower pH (as observed in this study) which inhibits the growth  
273 and activities of undesirable bacteria during silage (Oladosu et al., 2016). Acetic acid also possesses  
274 antifungal activity which reduces the spoilage of organisms in ensiled mass and improves the  
275 fermentation quality of silages. Zhang et al. (2010) mentioned that chopping rice straw before

276 ensiling could enhance the lactic acid concentration and total VFA content. The improved criteria  
277 observed in our study could also be due to chopping the rice straw before ensiling. Li et al. (2016)  
278 also demonstrated that homo fermentative and hetero-fermentative LAB could effectively improve  
279 the fermentation quality of the silage. Rice straw, a by-product of rice production which could be  
280 abundantly found in Southeast Asia which is the most important rice-producing region in the world  
281 (Zhang et al., 2010). Thus, by improving the nutritive value of this by-product through processes  
282 such as ensiling and inoculating beneficial microbes, farmers could overcome the limitations of feed  
283 sources in many parts of the tropics.

#### 284 ***In vitro* rumen fermentation characteristics, methane production and DM digestibility**

285 Some studies have reported the effectiveness of LAB inoculation on *in vitro* ruminal fermentation  
286 characteristics (Zhang et al., 2016; Baek et al., 2017; Zhang et al., 2017). Lack of effect on rumen pH  
287 and NH<sub>3</sub>-N after 15 and 30 days of ensiling among the LAB treatments in this study was contrary to  
288 the results of Zhang et al. (2010). They reported that three levels of LAB inoculants (LAB; 2×10<sup>5</sup>,  
289 3×10<sup>5</sup> and 4×10<sup>5</sup> cfu/g fresh forage) on rice straw (whole and chopped rice straw) silage decreased  
290 pH, NH<sub>3</sub>-N and acetic acid concentrations in Holstein dairy cows. Our results were consistent with  
291 theirs in terms of total VFA and propionic acid concentrations which showed respectively increase  
292 and decrease among the LAB treatments. Zhang et al. (2010) also concluded that the chopping  
293 process and LAB addition improved the silage quality of rice straw, and its partial substitution with  
294 corn silage could lower the cost of the dairy cow ration with no negative effects on lactation  
295 performance. Supplementing rice straw and sugar beet leaf silage treated with lactic acid bacteria  
296 enhanced performance and productivity of lactating Frisian cows in an *in vivo* study (El Tawab et al.,  
297 2017). Another *in vivo* study showed improved fermentation quality, as well as improved  
298 digestibility of feed components after feeding wethers with urea treated rice straw silage with LAB  
299 (Fang et al., 2012). In this study, the LAB treatments especially for *L. plantarum* and *S.bovis* showed  
300 the highest IVDMD and the lowest methane production. Different results obtained among variant

301 types of LAB in this study were consistent with Ellis et al. (2016) which showed that organic matter  
302 digestibility, gas and methane production vary with type of LAB added and type of substrate  
303 incubated. Our results were consistent with the previous studies and the results of Cao et al. (2013) in  
304 which vegetable residue silage inoculated with *L. plantarum* showed the highest IVDMD and lowest  
305 methane production. Methane is a by-product of the anaerobic fermentation of dietary carbohydrates  
306 in the rumen, and methanogenesis possesses a biological regulatory mechanism for animal health  
307 (Chen et al., 2017). However, Jafari et al. (2016) mentioned that methane formation is a contributing  
308 factor for the atmospheric burden of green-house gases, which is linked to the global warming and  
309 climate change as well as a significant energy loss for animal due to the exit of carbon.

### 310 ***In vitro* rumen microbial populations**

311 The growing public concern over the widespread use of antibiotics in livestock production and the  
312 emergence of antibiotic-resistant bacteria has stimulated interest in developing alternatives that  
313 promote animal performance and health. One potential alternative is the use of direct-fed microbials  
314 as feed additives to thrive in the gastrointestinal tract and prevent the establishment of pathogens  
315 (Jiao et al., 2017). LAB as a particular type of direct-fed microbials as well as LAB silage inoculants  
316 has exerted probiotic effects resulted in improvement in ruminant performance (Weinberg et al.,  
317 2016). In the current study, microbial populations were affected by the LAB treatments. *Fibrobacter*  
318 *succinogenes*, *Ruminococcus flavefaciens* and *Ruminococcus albus* which are the most predominant  
319 cellulolytic bacterial species in ruminants were highest among the LAB treatments. Jiao et al. (2016)  
320 reported about the beneficial effect of LAB on fiber digestion which could be due to the competition  
321 with the efficient lactate-producing rumen microorganisms on essential compounds. This  
322 competition might reduce the rate of lactate production by rumen bacteria which results in higher  
323 activity of cellulolytic rumen populations. Our results were in agreement with the previous study  
324 (Nguyen et al., 2017). According to Nguyen et al. (2017), dairy steers receiving rice straw and  
325 *Leucaena* silage enhanced rumen microbial population (especially cellulolytic), and fungal

326 population as well. They mentioned a decrease in the protozoal populations by the increase in the  
327 level of *Leucaena* silage. We also found decreases in the protozoal and methanogen populations by  
328 the LAB treatments. Jafari et al. (2018) reported that protozoa can provide electrons as a source of  
329 H<sub>2</sub> to the methanogens, and hence, antiprotozoal effects of feedstuff could decrease methane  
330 production by methanogens attached to protozoa. Moreover, fungal populations were increased in  
331 our studies among the LAB treatment groups. Nguyen et al. (2017) indicated that there was an  
332 increase in the numbers of fungal when protozoa have been removed from the rumen. They also  
333 mentioned that *Leucaena* silage could provide adequate nitrogen source for microbial growth leading  
334 to the increase in the bacterial population which could be the case for our result's. Consistent to our  
335 study, total mixed rations containing corn silage and/or grass silage increased total bacteria and  
336 *Fibrobacter succinogenes* in dairy cows (Lengowski et al., 2016). *B. fibrisolvens* which are involved  
337 in rumen fatty acid biohydrogenation were greater among LAB treatments in this study. Conjugated  
338 linoleic acid which has beneficial biological effects in animal models is formed as an intermediate  
339 during biohydrogenation of linoleic acid to stearic acid in the rumen by mainly *B. fibrisolvens* and  
340 other rumen bacteria (Ebrahimi et al., 2018).

## 341 **Conclusions**

342 In conclusion, inoculation of Lactobacillus (10<sup>6</sup> g<sup>-1</sup> DM) in rice straw silage improved the silage  
343 quality (e.g high CP content) and fermentation characteristic (e.g. increase in production of lactic  
344 acid and acetic acid) in the silage. Among inoculated LAB, *L. plantarum* and *S. bovis* were found to  
345 be more potent for the fermentation. *In vitro* rumen digestibility test showed higher rumen  
346 digestibility, higher VFA production and lower methane production in the rice straw fermented with  
347 LAB particularly with *L. plantarum* and *S. bovis*. Moreover, analysis of rumen microbial population  
348 showed significant increases in the populations of cellulolytic bacterial (*Fibrobacter succinogenes*,  
349 *Butyrivibrio fibrisolvens* and *Ruminococcus flavafaciences*), protozoa, methanogens and archaea  
350 among the LAB treatments as compared with control. Overall, *L. plantarum*, *S. bovis* were found to

351 be more promising to be applied in rice straw fermentation; however, *in vivo* experiments need to  
352 confirm these results.

### 353 **Acknowledgment**

354 The authors would like to thank the faculty of Veterinary Medicine, University of Putra in Malaysia  
355 as well as Ratchadapisek Somphot Fund for Postdoctoral Fellowship in Chulalongkorn University.

### 356 **Conflict of interests**

357 None.

### 358 **References**

- 359 AOAC 1990. AOAC. Official methods of analysis of the Association of Official Analytical Chemists. Vol 1.  
360 In: The Association.
- 361 Baek YC, Kim MS, Reddy KE, Oh YK, Jung YH, Yeo JM and Choi H 2017. Rumen fermentation and  
362 digestibility of spent mushroom (*Pleurotus ostreatus*) substrate inoculated with *Lactobacillus brevis*  
363 for Hanwoo steers. *Revista Colombiana de Ciencias Pecuarias*. 30(4): 267-277.
- 364 Cao Y, Cai Y and Takahashi T 2013. Ruminant digestibility and quality of silage conserved via fermentation  
365 by lactobacilli. In: *Lactic Acid Bacteria-R & D for Food, Health and Livestock Purposes*. InTech.
- 366 Chen L, Ren A, Zhou C and Tan Z 2017. Effects of *Lactobacillus acidophilus* supplementation for improving  
367 *in vitro* rumen fermentation characteristics of cereal straws. *Italian Journal of Animal Science*. 16(1):  
368 52-60.
- 369 Chen L, Yuan X, Li J, Dong Z, Wang S, Guo G and Shao T 2019. Effects of applying lactic acid bacteria and  
370 propionic acid on fermentation quality, aerobic stability and *in vitro* gas production of forage-based  
371 total mixed ration silage in Tibet. *Animal Production Science*. 59(2): 376-383.
- 372 Contreras-Govea FE, Muck RE, Mertens DR and Weimer PJ 2011. Microbial inoculant effects on silage and  
373 *in vitro* ruminal fermentation, and microbial biomass estimation for alfalfa, bmr corn, and corn  
374 silages. *Animal Feed Science and Technology*. 163(1): 2-10.
- 375 Ebrahimi M 2012. Production of Omega-3 Polyunsaturated Fatty Acid-entiched Chevron Using Treated Oil  
376 Palm (*Elaeis Guineensis* Jacq.) Frond Silage. Universiti Putra Malaysia.
- 377 Ebrahimi M, Rajion MA, Jafari S, Jahromi MF, Oskoueian E, Sazili AQ, Goh YM and Ghaffari MH 2018.  
378 Effects of dietary n-6: n-3 polyunsaturated fatty acid ratios on meat quality, carcass characteristics,  
379 tissue fatty acid profiles, and expression of lipogenic genes in growing goats. *PloS one*. 13(8):  
380 e0188369.
- 381 El Tawab AMA, Hassan AAM, Khattab MSAE, Matloup OH, Farahat ESA, Khalel MS, Morsy TA and  
382 Fouad MT 2017. Productive performance of lactating frisian cows fed sugar beet leaves silage treated  
383 with lactic acid bacteria. *International Journal of Zoological Research*. 13: 74-82.
- 384 ELLIS J, BANNINK A, HINDRICHSEN I, KINIEY R, PEIHKAN W, MIORA N and DIJKSTRA J 2016.  
385 Effect of lactic acid bacteria inoculants on *in vitro* rumen organic matter digestibility, total gas and  
386 methane production. *Animal Feed Science and Technology*. 34-39.
- 387 Fang J, Matsuzaki M, Suzuki H, Cai Y, Horiguchi Ki and Takahashi T 2012. Effects of lactic acid bacteria  
388 and urea treatment on fermentation quality, digestibility and ruminal fermentation of roll bale rice  
389 straw silage in wethers. *Grassland science*. 58(2): 73-78.

- 390 Ghazali H, Wan M and Wan Z 2013. Effects of inoculating *Lactobacillus plantarum*, molasses and urea on the  
391 fermentation of whole crop rice silage. *Malaysian Journal of Animal Science*. 16(2): 75-82.
- 392 He L, Zhou W, Wang Y, Wang C, Chen X and Zhang Q 2018. Effect of applying lactic acid bacteria and  
393 cellulase on the fermentation quality, nutritive value, tannins profile and in vitro digestibility of  
394 *Neolamarckia cadamba* leaves silage. *Journal of animal physiology and animal nutrition*. 102(6):  
395 1429-1436.
- 396 Jafari S, Ebrahimi M, Goh YM, Rajion MA, Jahromi MF and Al-Jumaili WS 2018. Manipulation of rumen  
397 fermentation and methane gas production by plant secondary metabolites (saponin, tannin and  
398 essential oil): a review of ten-year studies. *Annals of Animal Science*.
- 399 Jafari S, Goh YM, Rajion MA, Jahromi MF, Ahmad YH and Ebrahimi M 2017. Papaya (*Carica papaya*) leaf  
400 methanolic extract modulates in vitro rumen methanogenesis and rumen biohydrogenation. *Animal  
401 Science Journal*. 88(2): 267-276.
- 402 Jafari S, Meng GY, Rajion MA, Jahromi MF and Ebrahimi M 2016. Manipulation of rumen microbial  
403 fermentation by polyphenol rich solvent fractions from papaya leaf to reduce green-house gas  
404 methane and biohydrogenation of C18 PUFA. *Journal of agricultural and food chemistry*. 64(22):  
405 4522-4530.
- 406 Jiao P, Liu F, Beauchemin K and Yang W 2017. Impact of strain and dose of lactic acid bacteria on in vitro  
407 ruminal fermentation with varying media pH levels and feed substrates. *Animal Feed Science and  
408 Technology*. 224: 1-13.
- 409 Kim JG, Ham JS, Li YW, Park HS, Huh C-S and Park B-C 2017. Development of a new lactic acid bacterial  
410 inoculant for fresh rice straw silage. *Asian-Australasian journal of animal sciences*. 30(7): 950.
- 411 Lengowski MB, Zuber KH, Witzig M, Möhring J, Boguhn J and Rodehutschord M 2016. Changes in Rumen  
412 microbial community composition during adaptation to an in vitro system and the impact of different  
413 forages. *PloS one*. 11(2): e0150115.
- 414 Li X, Xu W, Yang J, Zhao H, Pan C, Ding X and Zhang Y 2016. Effects of applying lactic acid bacteria to the  
415 fermentation on a mixture of corn steep liquor and air-dried rice straw. *Animal Nutrition*. 2(3): 229-  
416 233.
- 417 LIU J-j, LIU X-p, REN J-w, ZHAO H-y, YUAN X-f, WANG X-f, Salem AZ and CUI Z-j 2015. The effects  
418 of fermentation and adsorption using lactic acid bacteria culture broth on the feed quality of rice  
419 straw. *Journal of Integrative Agriculture*. 14(3): 503-513.
- 420 Nguyen TTG, Wanapat M, Phesatcha K and Kang S 2017. Effect of inclusion of different levels of *Leucaena*  
421 silage on rumen microbial population and microbial protein synthesis in dairy steers fed on rice straw.  
422 *Asian-Australasian journal of animal sciences*. 30(2): 181.
- 423 Ni K, Wang Y, Li D, Cai Y and Pang H 2015. Characterization, identification and application of lactic acid  
424 bacteria isolated from forage paddy rice silage. *PloS one*. 10(3): e0121967.
- 425 Oladosu Y, Ruffi MY, Abdullah N, Magaji U, Hussin G, Ramli A and Miah G 2016. Fermentation quality and  
426 additives: a case of rice straw silage. *BioMed research international*. 2016.
- 427 Ørskov E and McDonald I 1979. The estimation of protein degradability in the rumen from incubation  
428 measurements weighted according to rate of passage. *The Journal of Agricultural Science*. 92(2): 499-  
429 503.
- 430 Saha UK, Sonon LS, Hancock DW, Hill NS, Stewart L, Heusner GL and Kissel DE 2010. Common terms  
431 used in animal feeding and nutrition.
- 432 SAS 2003. *SAS User's Guide Version 9.1*. Cary, NC, USA: Statistical Analysis Institute, Inc.
- 433 Silva V, Pereira O, Leandro E, Da Silva T, Ribeiro K, Mantovani H and Santos S 2016. Effects of lactic acid  
434 bacteria with bacteriocinogenic potential on the fermentation profile and chemical composition of  
435 alfalfa silage in tropical conditions. *Journal of dairy science*. 99(3): 1895-1902.
- 436 Van Soest Pv, Robertson J and Lewis B 1991. Methods for dietary fiber, neutral detergent fiber, and nonstarch  
437 polysaccharides in relation to animal nutrition. *Journal of dairy science*. 74(10): 3583-3597.
- 438 Weinberg Z, Chen Y, Volchinski V, Sela S, Ogunade I and Adesogan A 2016. An in vitro model to study  
439 interactions between *Escherichia coli* and lactic acid bacterial inoculants for silage in rumen fluid.  
440 *Letters in applied microbiology*. 63(1): 60-65.
- 441 Zhang H, Zhang P, Ye J, Wu Y, Fang W, Gou X and Zeng G 2016. Improvement of methane production from  
442 rice straw with rumen fluid pretreatment: a feasibility study. *International Biodeterioration &  
443 Biodegradation*. 113: 9-16.



- 444 Zhang Q, Yang H and Yu Z 2017. Effects of sucrose, formic acid and lactic acid bacteria inoculant on quality,  
445 in vitro rumen digestibility and fermentability of drooping wild ryegrass (*Elymus nutans* Griseb.)  
446 silage. *J. Anim. Feed Sci.* 26(1): 26-32.
- 447 Zhang Y, Xin H and Hua J 2010. Effects of treating whole-plant or chopped rice straw silage with different  
448 levels of lactic acid bacteria on silage fermentation and nutritive value for lactating Holsteins. *Asian-  
449 Australasian Journal of Animal Sciences.* 23(12): 1601-1607.

450

451

452

453

454

455

456

**Table 1.** Ingredients and chemical composition of the diets fed to the cows for *in vitro* study

---

| <b>Ingredients (g/kg DM)</b>          |        |
|---------------------------------------|--------|
| Alfalfa Hay                           | 314.10 |
| Corn, grain                           | 170.00 |
| Soybean meal                          | 133.00 |
| Palm kernel cake                      | 251.10 |
| Rice Bran                             | 81.80  |
| Sunflower oil                         | 20.00  |
| Mineral Premix                        | 5.00   |
| Vitamin Premix                        | 5.00   |
| Ammonium chloride                     | 10.00  |
| Limestone                             | 10.00  |
| <b>Chemical composition (g/kg DM)</b> |        |
| DM (%)                                | 850.20 |
| CP                                    | 208.30 |
| EE                                    | 52.50  |
| NDF                                   | 419.00 |
| ADF                                   | 253.00 |

---

DM, dry matter; CP, crude protein, EE, ether extract; NDF, neutral detergent fiber; ADF, acid detergent fiber.

**Table 2.** Microorganisms and sequences of the primers used in this study (Ebrahimi 2012).

| <b>Target microorganism</b>        | <b>Primer sequences (5'- 3')</b> |
|------------------------------------|----------------------------------|
| <i>Fibrobacter succinogenes</i> F  | GGTATGGGATGAGCTTGC               |
| <i>Fibrobacter succinogenes</i> R  | GCCTGCCCTGAACTATC                |
| <i>Ruminococcus albus</i> F        | CCCTAAAAGCAGTCTTAGTTCG           |
| <i>Ruminococcus albus</i> R        | CCTCCTTGCGGTTAGAACA              |
| <i>Ruminococcus flavefaciens</i> F | CGAACGGAGATAATTTGAGTTTACTTAGG    |
| <i>Ruminococcus flavefaciens</i> R | CGGTCTCTGTATGTTATGAGGTATTACC     |
| General bacteria F                 | CGGCAACGAGCGCAACCC               |
| General bacteria R                 | CCATTGTAGCACGTGTGTAGCC           |
| General anaerobic fungi F          | GAGGAAGTAAAAGTCGTAACAAGGTTTC     |
| General anaerobic fungi R          | CAAATTCACAAAGGGTAGGATGATT        |
| Total Protozoa F                   | GCTTTCGWTGGTAGTGTATT             |
| Total Protozoa R                   | CTTGCCCTCYAATCGTWCT              |
| Total methanogens F                | GCTCAGTAACACGTGG                 |
| Total methanogens R                | CGGTGTGTGCAAGGAG                 |
| Total archaea F                    | ATTAGATACCCSBGTAGTCC             |
| Total archaea R                    | GCCATGCACCWCCTCT                 |

<sup>1</sup>F: forward; <sup>2</sup>R: reverse

**Table 3.** Effect of inoculation of LAB on chemical composition of ensiled rice straw (DM basis)

| Treatments           | Day | DM                 | CP                 | NDF               | ADF                | GE                 | Glucose <sup>1</sup> | Fructose <sup>1</sup> | Xylose <sup>1</sup> |
|----------------------|-----|--------------------|--------------------|-------------------|--------------------|--------------------|----------------------|-----------------------|---------------------|
| Control              | 15  | 34.8 <sup>a</sup>  | 9.3 <sup>c</sup>   | 69.2 <sup>a</sup> | 56.2 <sup>a</sup>  | 15.7 <sup>a</sup>  | 53.6 <sup>a</sup>    | 0.4 <sup>a</sup>      | 0.4                 |
|                      | 30  | 33.6 <sup>a</sup>  | 9.8 <sup>c</sup>   | 70.2 <sup>a</sup> | 56.8 <sup>a</sup>  | 15.9 <sup>a</sup>  | 48.2 <sup>b</sup>    | 0.4 <sup>a</sup>      | 0.4                 |
| <i>L. plantarum</i>  | 15  | 30.5 <sup>bc</sup> | 11.8 <sup>b</sup>  | 66.8 <sup>c</sup> | 53.3 <sup>b</sup>  | 15.5 <sup>a</sup>  | 35.9 <sup>c</sup>    | 0.3 <sup>ab</sup>     | 0.4                 |
|                      | 30  | 29.2 <sup>c</sup>  | 12.7 <sup>a</sup>  | 64.1 <sup>d</sup> | 49.4 <sup>c</sup>  | 14.8 <sup>ab</sup> | 12.2 <sup>h</sup>    | 0.1 <sup>c</sup>      | 0.3                 |
| <i>L. salivarius</i> | 15  | 33.2 <sup>a</sup>  | 11.2 <sup>b</sup>  | 68.9 <sup>a</sup> | 53.8 <sup>b</sup>  | 15.7 <sup>a</sup>  | 36.1 <sup>c</sup>    | 0.3 <sup>ab</sup>     | 0.4                 |
|                      | 30  | 32.8 <sup>ab</sup> | 12.1 <sup>ab</sup> | 66.6 <sup>c</sup> | 51.9 <sup>c</sup>  | 15.5 <sup>a</sup>  | 25.4 <sup>f</sup>    | 0.2 <sup>b</sup>      | 0.4                 |
| <i>L. reuteri</i>    | 15  | 32.5 <sup>ab</sup> | 10.9 <sup>bc</sup> | 67.6 <sup>b</sup> | 53.7 <sup>b</sup>  | 15.9 <sup>a</sup>  | 32.7 <sup>d</sup>    | 0.3 <sup>ab</sup>     | 0.4                 |
|                      | 30  | 31.3 <sup>b</sup>  | 10.9 <sup>bc</sup> | 66.6 <sup>c</sup> | 52.5 <sup>bc</sup> | 15.0 <sup>a</sup>  | 24.6 <sup>f</sup>    | 0.2 <sup>b</sup>      | 0.3                 |
| <i>L. brevis</i>     | 15  | 33.4 <sup>a</sup>  | 10.6 <sup>bc</sup> | 66.9 <sup>c</sup> | 52.9 <sup>bc</sup> | 15.3 <sup>a</sup>  | 33.2 <sup>d</sup>    | 0.3 <sup>ab</sup>     | 0.4                 |
|                      | 30  | 32.4 <sup>ab</sup> | 10.9 <sup>bc</sup> | 66.6 <sup>c</sup> | 50.6 <sup>c</sup>  | 15.1 <sup>a</sup>  | 30.4 <sup>e</sup>    | 0.2 <sup>b</sup>      | 0.3                 |
| <i>S. bovis</i>      | 15  | 32.6 <sup>ab</sup> | 12.4 <sup>a</sup>  | 67.5 <sup>b</sup> | 52.1 <sup>bc</sup> | 15.7 <sup>a</sup>  | 34.6 <sup>cd</sup>   | 0.3 <sup>ab</sup>     | 0.3                 |
|                      | 30  | 31.5 <sup>b</sup>  | 12.5 <sup>a</sup>  | 64.8 <sup>d</sup> | 50.8 <sup>c</sup>  | 15.3 <sup>a</sup>  | 19.7 <sup>g</sup>    | 0.2 <sup>b</sup>      | 0.3                 |
| SEM                  | -   | 0.60               | 0.43               | 0.46              | 0.97               | 0.65               | 0.83                 | 0.05                  | 0.08                |

<sup>1</sup>Unit: mg/g

DM, dry matter; CP, crude protein; NDF, neutral detergent fiber; ADF, acid detergent fiber; GE, gross energy. Means in each column with different superscripts are significantly different (P<0.05).

SEM, standard error of the mean.

**Table 4.** Effects of inoculation of LAB on fermentation quality of ensiled rice straw

|                      | D |                   | Lactic             | Acetic             | Propioni          | Butyric           | NH <sub>3</sub> -N | LAB               |
|----------------------|---|-------------------|--------------------|--------------------|-------------------|-------------------|--------------------|-------------------|
|                      | a | pH                | acid               | acid               | c acid            | acid              | (%)                | (log              |
|                      | y |                   | (mM)               | (mM)               | (mM)              | (mM)              |                    | cfu/g)            |
| Control              | 1 |                   |                    |                    |                   |                   |                    |                   |
|                      | 5 | 5.6 <sup>a</sup>  | 5.1 <sup>f</sup>   | 10.5 <sup>e</sup>  | 1.3 <sup>b</sup>  | 5.5 <sup>a</sup>  | 0.05               | 5.2 <sup>c</sup>  |
|                      | 3 |                   |                    |                    |                   |                   |                    |                   |
| <i>L. plantarum</i>  | 0 | 5.6 <sup>a</sup>  | 9.4 <sup>e</sup>   | 11.6 <sup>e</sup>  | 1.6 <sup>b</sup>  | 4.6 <sup>a</sup>  | 0.05               | 5.8 <sup>c</sup>  |
|                      | 1 |                   |                    |                    |                   |                   |                    |                   |
|                      | 5 | 5.2 <sup>ab</sup> | 19.6 <sup>c</sup>  | 20.8 <sup>b</sup>  | 1.9 <sup>ab</sup> | 1.7 <sup>cd</sup> | 0.04               | 6.6 <sup>bc</sup> |
| <i>L. salivarius</i> | 3 |                   |                    |                    |                   |                   |                    |                   |
|                      | 0 | 4.4 <sup>b</sup>  | 36.9 <sup>a</sup>  | 24.1 <sup>a</sup>  | 2.9 <sup>a</sup>  | 1.7 <sup>cd</sup> | 0.05               | 8.8 <sup>a</sup>  |
|                      | 1 |                   |                    |                    |                   |                   |                    |                   |
| <i>L. salivarius</i> | 5 | 5.4 <sup>a</sup>  | 14.6 <sup>d</sup>  | 13.4 <sup>d</sup>  | 1.2 <sup>b</sup>  | 3.3 <sup>b</sup>  | 0.05               | 6.5 <sup>bc</sup> |
|                      | 3 |                   |                    |                    |                   |                   |                    |                   |
|                      | 0 | 4.8 <sup>b</sup>  | 22.4 <sup>bc</sup> | 19.1 <sup>bc</sup> | 1.3 <sup>b</sup>  | 2.4 <sup>b</sup>  | 0.05               | 7.3 <sup>b</sup>  |
| <i>L. reuteri</i>    | 1 |                   |                    |                    |                   |                   |                    |                   |
|                      | 5 | 5.5 <sup>a</sup>  | 15.5 <sup>d</sup>  | 14.2 <sup>d</sup>  | 1.5 <sup>b</sup>  | 2.2 <sup>c</sup>  | 0.05               | 6.4 <sup>bc</sup> |
|                      | 3 |                   |                    |                    |                   |                   |                    |                   |
| <i>L. reuteri</i>    | 0 | 4.8 <sup>b</sup>  | 26.6 <sup>b</sup>  | 17.4 <sup>c</sup>  | 2.1 <sup>ab</sup> | 2.1 <sup>c</sup>  | 0.06               | 7.1 <sup>b</sup>  |
|                      | 1 |                   |                    |                    |                   |                   |                    |                   |
|                      | 5 | 5.3 <sup>a</sup>  | 16.9 <sup>c</sup>  | 14.4 <sup>d</sup>  | 1.4 <sup>b</sup>  | 2.6 <sup>b</sup>  | 0.05               | 6.6 <sup>bc</sup> |
| <i>L. brevis</i>     | 3 |                   |                    |                    |                   |                   |                    |                   |
|                      | 0 | 4.9 <sup>b</sup>  | 24.1 <sup>b</sup>  | 18.1 <sup>c</sup>  | 1.7 <sup>b</sup>  | 2.1 <sup>c</sup>  | 0.05               | 7.3 <sup>b</sup>  |
|                      | 1 |                   |                    |                    |                   |                   |                    |                   |
| <i>S. bovis</i>      | 5 | 5.3 <sup>a</sup>  | 19.9 <sup>c</sup>  | 19.5 <sup>bc</sup> | 1.6 <sup>b</sup>  | 1.7 <sup>cd</sup> | 0.04               | 6.8 <sup>bc</sup> |
|                      | 3 |                   |                    |                    |                   |                   |                    |                   |
|                      | 0 | 4.3 <sup>b</sup>  | 35.7 <sup>a</sup>  | 22.5 <sup>ab</sup> | 2.5 <sup>a</sup>  | 1.2 <sup>d</sup>  | 0.05               | 8.2 <sup>ab</sup> |
| SEM                  | - | 0.31              | 1.14               | 0.88               | 0.53              | 1.01              | 0.004              | 0.48              |

Means in each column with different superscripts are significantly different (P<0.05).

SEM, standard error of the mean.

**Table 5.** Effects of inoculation of LAB on *in vitro* rumen fermentation

| Treatments           | Day | DMD                | Total gas          | pH   | NH <sub>3</sub> -N | Total VFA (mM)     | Acetic acid        | Propionic acid     | CH <sub>4</sub>  | CH <sub>4</sub> /total gas | a    | b                  | c    | a+b                |
|----------------------|-----|--------------------|--------------------|------|--------------------|--------------------|--------------------|--------------------|------------------|----------------------------|------|--------------------|------|--------------------|
| Control              | 15  | 21.4 <sup>f</sup>  | 45.5 <sup>a</sup>  | 6.9  | 14.3               | 65.6 <sup>g</sup>  | 45.5 <sup>g</sup>  | 13.6 <sup>a</sup>  | 7.8 <sup>a</sup> | 0.17 <sup>a</sup>          | 7.0  | 43.0 <sup>cd</sup> | 0.05 | 50.0 <sup>d</sup>  |
|                      | 30  | 22.2 <sup>f</sup>  | 45.0 <sup>a</sup>  | 6.9  | 15.6               | 67.5 <sup>ef</sup> | 44.5 <sup>g</sup>  | 12.7 <sup>ab</sup> | 7.9 <sup>a</sup> | 0.18 <sup>a</sup>          | 6.0  | 44.0 <sup>c</sup>  | 0.05 | 50.0 <sup>d</sup>  |
| <i>L. plantarum</i>  | 15  | 25.4 <sup>de</sup> | 42.0 <sup>bc</sup> | 6.9  | 15.3               | 74.7 <sup>c</sup>  | 46.1 <sup>fg</sup> | 12.4 <sup>b</sup>  | 4.2 <sup>c</sup> | 0.10 <sup>cd</sup>         | 6.5  | 44.0 <sup>c</sup>  | 0.05 | 50.5 <sup>cd</sup> |
|                      | 30  | 29.4 <sup>a</sup>  | 37.5 <sup>c</sup>  | 6.9  | 15.9               | 79.7 <sup>a</sup>  | 54.4 <sup>a</sup>  | 12.9 <sup>ab</sup> | 4.1 <sup>c</sup> | 0.11 <sup>cd</sup>         | 7.7  | 48.5 <sup>a</sup>  | 0.05 | 56.2 <sup>a</sup>  |
| <i>L. salivarius</i> | 15  | 22.4 <sup>f</sup>  | 43.5 <sup>b</sup>  | 6.8  | 15.2               | 68.8 <sup>e</sup>  | 47.0 <sup>f</sup>  | 12.4 <sup>b</sup>  | 6.1 <sup>b</sup> | 0.14 <sup>b</sup>          | 6.5  | 43.5 <sup>c</sup>  | 0.05 | 50.0 <sup>d</sup>  |
|                      | 30  | 26.4 <sup>cd</sup> | 41.0 <sup>c</sup>  | 6.8  | 15.8               | 76.1 <sup>b</sup>  | 49.7 <sup>d</sup>  | 13.0 <sup>ab</sup> | 5.9 <sup>b</sup> | 0.14 <sup>b</sup>          | 6.5  | 45.5 <sup>b</sup>  | 0.05 | 52.0 <sup>c</sup>  |
| <i>L. reuteri</i>    | 15  | 22.4 <sup>f</sup>  | 40.5 <sup>c</sup>  | 6.8  | 14.9               | 70.6 <sup>d</sup>  | 46.7 <sup>f</sup>  | 13.3 <sup>a</sup>  | 4.5 <sup>c</sup> | 0.11 <sup>cd</sup>         | 6.5  | 43.5 <sup>c</sup>  | 0.05 | 50.0 <sup>d</sup>  |
|                      | 30  | 26.4 <sup>cd</sup> | 40.0 <sup>cd</sup> | 6.8  | 15.5               | 74.5 <sup>c</sup>  | 51.6 <sup>c</sup>  | 13.2 <sup>a</sup>  | 4.6 <sup>c</sup> | 0.12 <sup>c</sup>          | 6.0  | 45.7 <sup>b</sup>  | 0.05 | 51.7 <sup>c</sup>  |
| <i>L. brevis</i>     | 15  | 22.1 <sup>f</sup>  | 43.0 <sup>b</sup>  | 6.8  | 15.3               | 67.2 <sup>ef</sup> | 48.3 <sup>de</sup> | 12.5 <sup>b</sup>  | 5.2 <sup>b</sup> | 0.12 <sup>c</sup>          | 6.25 | 42.5 <sup>cd</sup> | 0.05 | 48.7 <sup>e</sup>  |
|                      | 30  | 27.4 <sup>bc</sup> | 42.0 <sup>bc</sup> | 6.8  | 15.6               | 78.3 <sup>ab</sup> | 52.7 <sup>b</sup>  | 13.6 <sup>a</sup>  | 5.4 <sup>b</sup> | 0.13 <sup>bc</sup>         | 7.5  | 46.0 <sup>b</sup>  | 0.05 | 53.5 <sup>bc</sup> |
| <i>S. bovis</i>      | 15  | 24.4 <sup>ef</sup> | 40.5 <sup>c</sup>  | 6.8  | 15.1               | 74.5 <sup>c</sup>  | 49.2 <sup>d</sup>  | 13.8 <sup>a</sup>  | 5.7 <sup>b</sup> | 0.14 <sup>b</sup>          | 7.0  | 44.5 <sup>bc</sup> | 0.05 | 51.5 <sup>c</sup>  |
|                      | 30  | 28.4 <sup>ab</sup> | 39.5 <sup>cd</sup> | 6.8  | 15.7               | 78.9 <sup>a</sup>  | 53.5 <sup>ab</sup> | 13.3 <sup>a</sup>  | 5.2 <sup>b</sup> | 0.13 <sup>bc</sup>         | 6.75 | 47.5 <sup>a</sup>  | 0.05 | 54.2 <sup>b</sup>  |
| SEM                  | -   | 0.68               | 0.84               | 0.03 | 0.48               | 1.07               | 0.48               | 0.32               | 0.26             | 0.004                      | 0.17 | 1.05               | 0.01 | 0.92               |

a, b, c, and a+b were calculated from exponential equation  $p=a+b(1-e^{-ct})$ .

a = gas production from the immediately soluble fraction, b = gas production from the insoluble fraction, c = gas production rate constant for the insoluble fraction (b),

(a + b) = potential extent of gas production.

DMD, dry matter digestibility; VFA, volatile fatty acid.

Means in each column with different superscripts are significantly different ( $P<0.05$ ).

**Table 6.** Effects of inoculation of LAB on *in vitro* rumen microbial populations

| Treatment            | Day | <i>Fibrobacter succinogenes</i> | <i>Butyrivibrio fibrisolvens</i> | <i>Ruminococcus flavafaciens</i> | Total bacteria     | Total fungi        | Total protozoa     | Total methanogens  | Total archaea      |
|----------------------|-----|---------------------------------|----------------------------------|----------------------------------|--------------------|--------------------|--------------------|--------------------|--------------------|
| Control              | 15  | 1.54 <sup>b</sup>               | 0.40 <sup>c</sup>                | 1.20 <sup>c</sup>                | 0.53 <sup>b</sup>  | 0.76 <sup>b</sup>  | 3.93 <sup>a</sup>  | 7.62 <sup>a</sup>  | 5.78 <sup>a</sup>  |
|                      | 30  | 1.61 <sup>b</sup>               | 0.72 <sup>c</sup>                | 1.31 <sup>bc</sup>               | 1.05 <sup>ab</sup> | 0.78 <sup>b</sup>  | 3.99 <sup>a</sup>  | 7.57 <sup>a</sup>  | 5.78 <sup>a</sup>  |
| <i>L. plantarum</i>  | 15  | 1.82 <sup>ab</sup>              | 1.28 <sup>b</sup>                | 1.91 <sup>b</sup>                | 1.42 <sup>a</sup>  | 1.07 <sup>ab</sup> | 3.62 <sup>ab</sup> | 7.34 <sup>ab</sup> | 5.34 <sup>ab</sup> |
|                      | 30  | 2.50 <sup>a</sup>               | 2.32 <sup>a</sup>                | 2.68 <sup>a</sup>                | 1.56 <sup>a</sup>  | 1.37 <sup>a</sup>  | 3.49 <sup>b</sup>  | 7.11 <sup>b</sup>  | 4.91 <sup>b</sup>  |
| <i>L. salivarius</i> | 15  | 1.64 <sup>b</sup>               | 1.12 <sup>c</sup>                | 1.33 <sup>bc</sup>               | 1.36 <sup>ab</sup> | 0.83 <sup>b</sup>  | 3.84 <sup>a</sup>  | 7.41 <sup>a</sup>  | 5.50 <sup>a</sup>  |
|                      | 30  | 1.89 <sup>ab</sup>              | 1.88 <sup>ab</sup>               | 2.19 <sup>ab</sup>               | 1.43 <sup>a</sup>  | 1.15 <sup>a</sup>  | 3.74 <sup>ab</sup> | 7.29 <sup>ab</sup> | 5.25 <sup>ab</sup> |
| <i>L. reuteri</i>    | 15  | 1.64 <sup>b</sup>               | 0.94 <sup>c</sup>                | 1.31 <sup>bc</sup>               | 1.33 <sup>ab</sup> | 0.83 <sup>b</sup>  | 3.86 <sup>a</sup>  | 7.47 <sup>a</sup>  | 5.35 <sup>ab</sup> |
|                      | 30  | 1.89 <sup>ab</sup>              | 1.35 <sup>b</sup>                | 2.07 <sup>ab</sup>               | 1.42 <sup>a</sup>  | 1.12 <sup>a</sup>  | 3.66 <sup>ab</sup> | 7.36 <sup>ab</sup> | 5.01 <sup>b</sup>  |
| <i>L. brevis</i>     | 15  | 1.71 <sup>b</sup>               | 1.13 <sup>c</sup>                | 1.35 <sup>bc</sup>               | 1.39 <sup>ab</sup> | 0.96 <sup>ab</sup> | 3.79 <sup>ab</sup> | 7.51 <sup>a</sup>  | 5.43 <sup>ab</sup> |
|                      | 30  | 2.12 <sup>a</sup>               | 1.91 <sup>ab</sup>               | 2.29 <sup>a</sup>                | 1.44 <sup>a</sup>  | 1.23 <sup>a</sup>  | 3.66 <sup>ab</sup> | 7.43 <sup>a</sup>  | 5.11 <sup>b</sup>  |
| <i>S. bovis</i>      | 15  | 1.77 <sup>b</sup>               | 1.16 <sup>bc</sup>               | 1.80 <sup>b</sup>                | 1.42 <sup>a</sup>  | 0.97 <sup>ab</sup> | 3.62 <sup>ab</sup> | 7.44 <sup>a</sup>  | 5.22 <sup>ab</sup> |
|                      | 30  | 2.24 <sup>a</sup>               | 2.13 <sup>a</sup>                | 2.55 <sup>a</sup>                | 1.47 <sup>a</sup>  | 1.34 <sup>a</sup>  | 3.53 <sup>b</sup>  | 7.22 <sup>b</sup>  | 4.99 <sup>b</sup>  |
| S.E.M                | -   | 0.15                            | 0.14                             | 0.13                             | 0.15               | 0.22               | 0.28               | 0.48               | 0.23               |

*Fibrobacter succinogenes*,  $\times 10^7$  copies/1 ml of rumen fluid & digesta; *Butyrivibrio fibrisolvens*,  $\times 10^4$  copies/1 ml of rumen fluid & digesta; *Ruminococcus flavafaciens*,  $\times 10^6$  copies/1 ml of rumen fluid & digesta; Total bacteria,  $\times 10^{10}$  copies/1 ml of rumen fluid & digesta; Total fungi,  $\times 10^7$  copies/1 ml of rumen fluid & digesta; Total protozoa,  $\times 10^7$  copies/1 ml of rumen fluid & digesta; Total methanogens,  $\times 10^7$  copies/1 ml of rumen fluid & digesta; Total archaea,  $\times 10^8$  copies/1 ml of rumen fluid & digesta.

Means in each column with different superscripts are significantly different ( $P < 0.05$ ).

SEM, standard error of the mean.
